# Supplementary material for: Positive and Negative Ions Potently Inhibit the Viability of Airborne Gram-Positive and Gram-Negative Bacteria
Source: PubMed Central journal article supplement (PMC8579920; doi:10.1128/spectrum.00651-21), 2021-11-10

**Figure S1.** Direct ion effect on the viability of *S. aureus* (A) and *E. coli* (B) plated at  $10^4$  CFU/ml on 150 mm Petri dishes, with the ionizer being placed at a distance of 5 or 10 cm. \*  $P < 0.05$ .

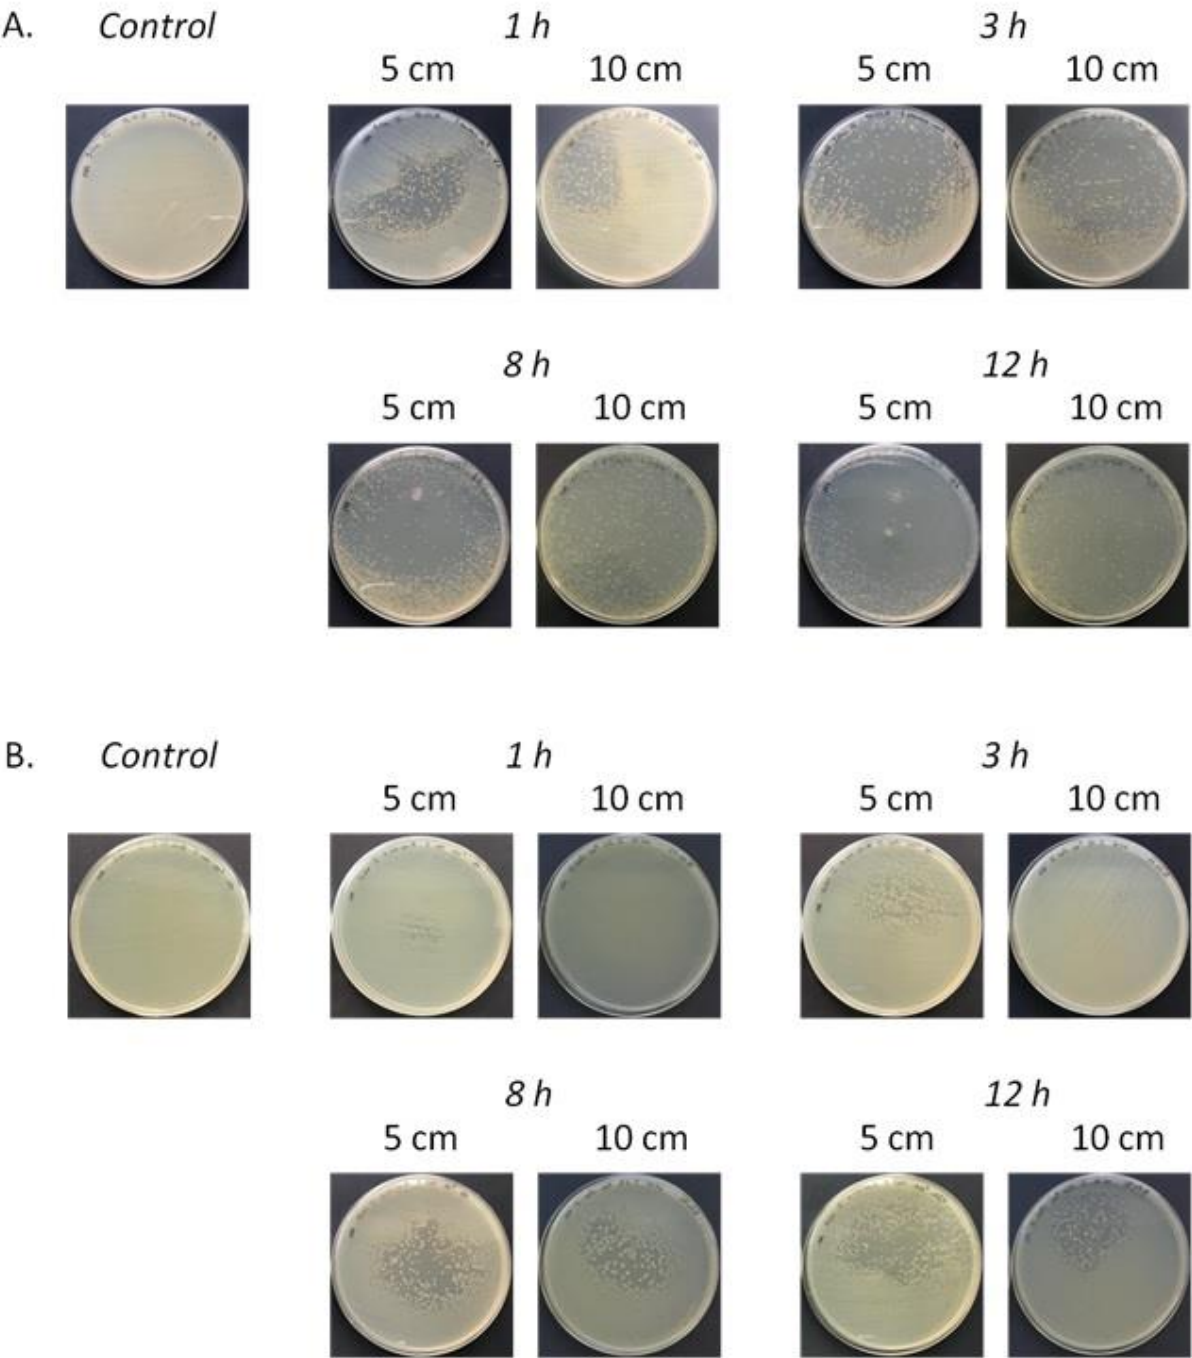

Supplement: spectrum00651-21_supp_1_seq2.pdf [file spectrum00651-21_supp_1_seq2.pdf]
